# Supplementary material for: Early diagnosis of myocardial infarction in clinic through CK-MB detection using magnetic separation integrated with chemiluminescence
Source: Royal Society of Chemistry journal article supplement (doi:10.1039/c5ay03350k), 2016-01-01
Supplement: c5ay03350k1.pdf [file c5ay03350k1.pdf]

Early Diagnosis of Myocardial Infarction in clinic through CK-MB Detection Using  
Magnetic Separation Integrated with Chemiluminescence

*Dongyuan Wang, Huisheng Zhang, Suwen Qi\*, and Wenwen Chen\**

**Table S1.** The analytical performance of the related methods and our method.

**Table S2.** The results of detection of CK-MB -depleted serum by our method.

**Table S3.** The results of detection of CK-MB -depleted serum by our method using other batch of reaction reagent.

**Table S4.** The results of detection of the five low samples by our method.

**Table S5.** The results of detection of the five low samples by our method using other batch of reaction reagent.

**Table S6.** The results of detection of 4 ng/mL, 70 ng/mL, and 200 ng/mL CK-MB with the presence of different concentration of bilirubin using our method.

**Table S7.** The results of detection of 4 ng/mL, 70 ng/mL, and 200 ng/mL CK-MB with the presence of different concentration of hemoglobin using our method.

**Table S8.** The results of detection of 4 ng/mL, 70 ng/mL, and 200 ng/mL CK-MB with the presence of different concentration of triglycerides using our method.

**Table S9.** The comparison results obtained by immunofluorescence method and our method.

**Figure S1.** Infrared spectroscopy of MB and antibody labelled MB.

**Figure S2.** TEM image of MB and antibody labelled MB.

**Table S1.** The analytical performance of the related methods and our method.

| Methods                   | Quantitative range | Advantage         | Disadvantage              |
|---------------------------|--------------------|-------------------|---------------------------|
| Immunoinhibitory assay    | 0-1000 U/L         | Low cost          | Many interference factors |
| Electrochemiluminescence  | 0.100-500 ng/mL    | Sensitive         | Complicated, expensive    |
| Colloidal gold test strip | ----               | Simple, low cost  | Qualitative               |
| Our method                | 0-500 ng/mL        | Sensitive, simple | ----                      |

**Table S2.** The results of detection of CK-MB -depleted serum by our method.

| Replicates | CK-MB (ng/mL) | Replicates | CK-MB (ng/mL) | Replicates | CK-MB (ng/mL) |
|------------|---------------|------------|---------------|------------|---------------|
| 1          | 0.013         | 21         | 0.064         | 41         | 0.081         |
| 2          | 0.027         | 22         | 0.065         | 42         | 0.082         |
| 3          | 0.031         | 23         | 0.066         | 43         | 0.083         |
| 4          | 0.032         | 24         | 0.066         | 44         | 0.085         |
| 5          | 0.033         | 25         | 0.067         | 45         | 0.086         |
| 6          | 0.044         | 26         | 0.067         | 46         | 0.086         |
| 7          | 0.045         | 27         | 0.067         | 47         | 0.090         |
| 8          | 0.047         | 28         | 0.069         | 48         | 0.091         |
| 9          | 0.049         | 29         | 0.069         | 49         | 0.092         |
| 10         | 0.055         | 30         | 0.070         | 50         | 0.095         |
| 11         | 0.055         | 31         | 0.073         | 51         | 0.095         |
| 12         | 0.055         | 32         | 0.074         | 52         | 0.096         |
| 13         | 0.056         | 33         | 0.075         | 53         | 0.096         |
| 14         | 0.057         | 34         | 0.075         | 54         | 0.096         |
| 15         | 0.058         | 35         | 0.076         | 55         | 0.097         |
| 16         | 0.059         | 36         | 0.077         | 56         | 0.097         |
| 17         | 0.059         | 37         | 0.077         | 57         | 0.097         |
| 18         | 0.063         | 38         | 0.078         | 58         | 0.099         |
| 19         | 0.063         | 39         | 0.080         | 59         | 0.103         |
| 20         | 0.064         | 40         | 0.081         | 60         | 0.105         |

**Table S3.** The results of detection of CK-MB -depleted serum by our method using other batch of reaction reagent.

| Replicates | CK-MB (ng/mL) | Replicates | CK-MB (ng/mL) | Replicates | CK-MB (ng/mL) |
|------------|---------------|------------|---------------|------------|---------------|
| 1          | 0.002         | 21         | 0.047         | 41         | 0.067         |
| 2          | 0.017         | 22         | 0.047         | 42         | 0.068         |
| 3          | 0.020         | 23         | 0.048         | 43         | 0.071         |

| Replicates | CK-MB<br>(ng/mL) | Replicates | CK-MB<br>(ng/mL) | Replicates | CK-MB<br>(ng/mL) |
|------------|------------------|------------|------------------|------------|------------------|
| 4          | 0.022            | 24         | 0.050            | 44         | 0.072            |
| 5          | 0.023            | 25         | 0.053            | 45         | 0.072            |
| 6          | 0.025            | 26         | 0.054            | 46         | 0.074            |
| 7          | 0.026            | 27         | 0.055            | 47         | 0.075            |
| 8          | 0.029            | 28         | 0.055            | 48         | 0.079            |
| 9          | 0.029            | 29         | 0.057            | 49         | 0.079            |
| 10         | 0.032            | 30         | 0.058            | 50         | 0.082            |
| 11         | 0.034            | 31         | 0.058            | 51         | 0.083            |
| 12         | 0.035            | 32         | 0.059            | 52         | 0.085            |
| 13         | 0.035            | 33         | 0.061            | 53         | 0.087            |
| 14         | 0.036            | 34         | 0.061            | 54         | 0.088            |
| 15         | 0.037            | 35         | 0.062            | 55         | 0.089            |
| 16         | 0.037            | 36         | 0.064            | 56         | 0.092            |
| 17         | 0.040            | 37         | 0.064            | 57         | 0.097            |
| 18         | 0.042            | 38         | 0.065            | 58         | 0.103            |
| 19         | 0.045            | 39         | 0.066            | 59         | 0.107            |
| 20         | 0.045            | 40         | 0.067            | 60         | 0.111            |

**Table S4.** The results of detection of the five low samples by our method.

|      | Orig. Sample<br>[ng/ml] | 0.250    | 0.280    | 0.300    | 0.350    | 0.380    |
|------|-------------------------|----------|----------|----------|----------|----------|
|      | Rep                     | Sample 1 | Sample 2 | Sample 3 | Sample 4 | Sample 5 |
| Run1 | rep 1                   | 0.126    | 0.267    | 0.237    | 0.247    | 0.443    |
|      | rep 2                   | 0.373    | 0.395    | 0.197    | 0.145    | 0.473    |
|      | rep 3                   | 0.339    | 0.123    | 0.285    | 0.456    | 0.167    |
|      | rep 4                   | 0.297    | 0.181    | 0.171    | 0.271    | 0.334    |
| Run2 | rep 1                   | 0.093    | 0.438    | 0.186    | 0.470    | 0.302    |
|      | rep 2                   | 0.217    | 0.290    | 0.258    | 0.250    | 0.479    |
|      | rep 3                   | 0.117    | 0.140    | 0.209    | 0.406    | 0.441    |
|      | rep 4                   | 0.101    | 0.188    | 0.325    | 0.250    | 0.173    |
| Run3 | rep 1                   | 0.325    | 0.268    | 0.497    | 0.203    | 0.354    |
|      | rep 2                   | 0.282    | 0.368    | 0.265    | 0.441    | 0.259    |
|      | rep 3                   | 0.279    | 0.235    | 0.335    | 0.427    | 0.472    |
|      | rep 4                   | 0.097    | 0.159    | 0.427    | 0.378    | 0.440    |
|      | SD                      |          |          | 0.116    |          |          |
|      | Mean                    |          |          | 0.290    |          |          |

**Table S5.** The results of detection of the five low samples by our method using other batch of reaction reagent.

| Orig. Sample [ng/ml] | 0.250 | 0.280 | 0.300 | 0.350 | 0.380 |
|----------------------|-------|-------|-------|-------|-------|
|----------------------|-------|-------|-------|-------|-------|

|      | Rep   | Sample 1 | Sample 2 | Sample 3 | Sample 4 | Sample 5 |
|------|-------|----------|----------|----------|----------|----------|
| Run1 | rep 1 | 0.139    | 0.231    | 0.185    | 0.398    | 0.361    |
|      | rep 2 | 0.129    | 0.303    | 0.455    | 0.259    | 0.255    |
|      | rep 3 | 0.173    | 0.256    | 0.507    | 0.257    | 0.458    |
|      | rep 4 | 0.385    | 0.205    | 0.344    | 0.244    | 0.339    |
| Run2 | rep 1 | 0.345    | 0.106    | 0.237    | 0.271    | 0.461    |
|      | rep 2 | 0.193    | 0.239    | 0.392    | 0.282    | 0.234    |
|      | rep 3 | 0.095    | 0.342    | 0.497    | 0.497    | 0.242    |
|      | rep 4 | 0.372    | 0.079    | 0.142    | 0.226    | 0.515    |
| Run3 | rep 1 | 0.168    | 0.249    | 0.229    | 0.278    | 0.457    |
|      | rep 2 | 0.133    | 0.218    | 0.253    | 0.393    | 0.290    |
|      | rep 3 | 0.160    | 0.121    | 0.340    | 0.476    | 0.304    |
|      | rep 4 | 0.223    | 0.376    | 0.288    | 0.498    | 0.448    |
| SD   |       |          |          | 0.119    |          |          |
| Mean |       |          |          | 0.293    |          |          |

**Table S6.** The results of detection of 4 ng/mL, 70 ng/mL, and 200 ng/mL CK-MB with the presence of different concentration of bilirubin using our method.

|               | [Conc] mg/mL | 0     | 0.1    | 0.2     | 0.3     | 0.4     |
|---------------|--------------|-------|--------|---------|---------|---------|
| Low Sample    | Rep 1        | 3.801 | 3.762  | 3.833   | 4.094   | 4.220   |
|               | Rep 2        | 3.903 | 3.765  | 4.065   | 3.691   | 4.009   |
|               | Rep 3        | 3.974 | 4.055  | 3.818   | 4.085   | 4.076   |
|               | Average      | 3.893 | 3.861  | 3.905   | 3.956   | 4.102   |
|               | % Recovery   |       | 96.53% | 97.63%  | 98.90%  | 102.55% |
| Medium Sample | Rep 1        | 70.38 | 66.16  | 68.72   | 63.10   | 69.41   |
|               | Rep 2        | 70.00 | 69.43  | 70.45   | 66.38   | 71.83   |
|               | Rep 3        | 67.60 | 70.92  | 71.42   | 73.52   | 75.92   |
|               | Average      | 69.33 | 68.84  | 70.20   | 67.67   | 72.39   |
|               | % Recovery   |       | 98.34% | 100.29% | 96.67%  | 103.41% |
| High Sample   | Rep 1        | 193.1 | 196.2  | 196.7   | 204.2   | 210.2   |
|               | Rep 2        | 196.3 | 193.1  | 198.2   | 197.8   | 186.7   |
|               | Rep 3        | 202.4 | 197.5  | 204.9   | 199.8   | 216.8   |
|               | Average      | 197.3 | 195.6  | 199.9   | 200.6   | 204.6   |
|               | % Recovery   |       | 97.80% | 99.95%  | 100.30% | 102.30% |

**Table S7.** The results of detection of 4 ng/mL, 70 ng/mL, and 200 ng/mL CK-MB with the presence of different concentration of hemoglobin using our method.

|            | [Conc] mg/dL | 0     | 500    | 1000   | 1500   | 2000   |
|------------|--------------|-------|--------|--------|--------|--------|
| Low Sample | Rep 1        | 3.692 | 3.785  | 3.801  | 3.909  | 4.086  |
|            | Rep 2        | 3.796 | 3.680  | 3.689  | 3.847  | 4.025  |
|            | Rep 3        | 3.766 | 3.754  | 3.853  | 3.791  | 3.779  |
|            | Average      | 3.751 | 3.740  | 3.781  | 3.849  | 3.963  |
|            | % Recovery   |       | 93.50% | 94.53% | 96.23% | 99.08% |

|               |            |       |        |        |        |        |
|---------------|------------|-------|--------|--------|--------|--------|
| Medium Sample | Rep 1      | 66.44 | 66.95  | 66.39  | 67.41  | 68.30  |
|               | Rep 2      | 66.91 | 66.70  | 69.13  | 66.51  | 70.16  |
|               | Rep 3      | 64.61 | 64.99  | 66.83  | 68.28  | 68.74  |
|               | Average    | 65.99 | 66.21  | 67.45  | 67.40  | 69.06  |
|               | % Recovery |       | 94.59% | 96.36% | 96.29% | 98.66% |
| High Sample   | Rep 1      | 192.5 | 186.8  | 181.9  | 196.3  | 202.4  |
|               | Rep 2      | 194.7 | 188.8  | 189.6  | 191.4  | 195.3  |
|               | Rep 3      | 188.9 | 188.8  | 195.5  | 179.0  | 200.2  |
|               | Average    | 192.0 | 188.1  | 189.0  | 188.9  | 199.3  |
|               | % Recovery |       | 94.05% | 94.50% | 94.45% | 99.65% |

**Table S8.** The results of detection of 4 ng/mL, 70 ng/mL, and 200 ng/mL CK-MB with the presence of different concentration of triglycerides using our method.

|               | [Conc] mg/dL | 0     | 500     | 1000    | 1500    | 2000    |
|---------------|--------------|-------|---------|---------|---------|---------|
| Low Sample    | Rep 1        | 3.991 | 4.019   | 4.044   | 3.887   | 3.850   |
|               | Rep 2        | 4.067 | 4.058   | 4.125   | 3.854   | 3.885   |
|               | Rep 3        | 4.072 | 3.964   | 3.828   | 4.094   | 4.003   |
|               | Average      | 4.043 | 4.014   | 3.999   | 3.945   | 3.913   |
|               | % Recovery   |       | 100.35% | 99.98%  | 98.63%  | 97.83%  |
| Medium Sample | Rep 1        | 71.79 | 68.75   | 71.04   | 69.53   | 69.98   |
|               | Rep 2        | 69.09 | 68.86   | 73.77   | 59.50   | 70.04   |
|               | Rep 3        | 69.83 | 67.65   | 64.68   | 70.33   | 74.69   |
|               | Average      | 70.24 | 68.42   | 69.83   | 66.46   | 71.57   |
|               | % Recovery   |       | 97.74%  | 99.76%  | 94.94%  | 102.24% |
| High Sample   | Rep 1        | 201.8 | 198.4   | 200.8   | 219.7   | 193.8   |
|               | Rep 2        | 204.0 | 201.3   | 201.3   | 187.7   | 190.9   |
|               | Rep 3        | 193.9 | 198.1   | 198.1   | 196.4   | 198.1   |
|               | Average      | 199.9 | 199.3   | 200.1   | 201.3   | 194.3   |
|               | % Recovery   |       | 99.65%  | 100.05% | 100.65% | 97.15%  |

**Table S9.** The comparison results obtained by immunofluorescence method and our method.

| Sample Number | Immunofluorescence method (ng/mL) | Our method (ng/mL) | Recovery % |
|---------------|-----------------------------------|--------------------|------------|
| 1             | 34.36                             | 34.01              | 98.98      |
| 2             | 215.45                            | 224.67             | 104.2      |
| 3             | 254.01                            | 251.88             | 99.16      |
| 4             | 47.25                             | 46.14              | 97.65      |
| 5             | 2.21                              | 2.25               | 101.8      |
| 6             | 15.62                             | 15.65              | 100.1      |
| 7             | 1.99                              | 2                  | 100.5      |
| 8             | 4.31                              | 4.41               | 102.3      |

---

|    |        |        |       |
|----|--------|--------|-------|
| 9  | 1.31   | 1.28   | 97.71 |
| 10 | 57.71  | 57.9   | 100.3 |
| 11 | 3.33   | 3.46   | 103.9 |
| 12 | 1.62   | 1.6    | 98.77 |
| 13 | 22.18  | 22.62  | 102.0 |
| 14 | 81.75  | 78.57  | 96.11 |
| 15 | 4.77   | 4.73   | 99.16 |
| 16 | 1.59   | 1.56   | 98.11 |
| 17 | 18.1   | 18.95  | 104.7 |
| 18 | 37.61  | 36.12  | 96.04 |
| 19 | 6.29   | 6.55   | 104.1 |
| 20 | 5.12   | 4.94   | 96.48 |
| 21 | 69.5   | 69.05  | 99.35 |
| 22 | 103.05 | 107.5  | 104.3 |
| 23 | 2.19   | 2.2    | 100.5 |
| 24 | 2.84   | 2.9    | 102.1 |
| 25 | 258.97 | 257.09 | 99.27 |
| 26 | 2.68   | 2.78   | 103.7 |
| 27 | 108.71 | 110.3  | 101.5 |
| 28 | 89.94  | 89.41  | 99.41 |
| 29 | 30.87  | 30.72  | 99.51 |
| 30 | 7.23   | 7.26   | 100.4 |
| 31 | 77.9   | 78.54  | 100.8 |
| 32 | 237.96 | 237.66 | 99.87 |
| 33 | 146.01 | 147.95 | 101.3 |
| 34 | 148.16 | 149.89 | 101.2 |
| 35 | 198    | 205.13 | 103.6 |
| 36 | 7.43   | 7.49   | 100.8 |
| 37 | 181.85 | 184.27 | 101.3 |
| 38 | 172.99 | 168.92 | 97.65 |
| 39 | 3.29   | 3.24   | 98.48 |
| 40 | 6.21   | 5.93   | 95.49 |
| 41 | 76.54  | 79.26  | 103.6 |
| 42 | 24.6   | 24.73  | 100.5 |
| 43 | 153.6  | 153.55 | 99.97 |
| 44 | 68.59  | 71.93  | 104.9 |
| 45 | 11.26  | 11.79  | 104.7 |
| 46 | 197.64 | 193.12 | 97.71 |
| 47 | 114.09 | 109.24 | 95.75 |
| 48 | 11.63  | 11.5   | 98.88 |
| 49 | 16.83  | 17.59  | 104.5 |
| 50 | 235.2  | 234.71 | 99.79 |

---

---

|    |        |        |        |
|----|--------|--------|--------|
| 51 | 45.39  | 43.19  | 95.15  |
| 52 | 95.14  | 92.34  | 97.06  |
| 53 | 229.27 | 218.03 | 95.10  |
| 54 | 114.74 | 108.51 | 94.57  |
| 55 | 19.68  | 19.63  | 99.75  |
| 56 | 5.54   | 5.31   | 95.85  |
| 57 | 176.58 | 177.51 | 100.5  |
| 58 | 263.03 | 256.59 | 97.55  |
| 59 | 46.48  | 45.88  | 98.71  |
| 60 | 60.93  | 64.97  | 106.6  |
| 61 | 275.97 | 283.77 | 102.8  |
| 62 | 160.04 | 151.53 | 94.68  |
| 63 | 242.2  | 229.84 | 94.90  |
| 64 | 61.35  | 60.89  | 99.25  |
| 65 | 145.79 | 148.13 | 101.6  |
| 66 | 205.15 | 194.19 | 94.66  |
| 67 | 85.29  | 89.3   | 104.7  |
| 68 | 45.01  | 43.72  | 97.13  |
| 69 | 175.58 | 169.3  | 96.42  |
| 70 | 51.01  | 47.34  | 92.81  |
| 71 | 123.08 | 124.64 | 101.3  |
| 72 | 51.71  | 51.16  | 98.94  |
| 73 | 73.89  | 69.39  | 93.91  |
| 74 | 43.01  | 44.81  | 104.2  |
| 75 | 194.94 | 203.41 | 104.3  |
| 76 | 103.93 | 101.2  | 97.37  |
| 77 | 22.9   | 22.75  | 99.34  |
| 78 | 35.32  | 33.95  | 96.12  |
| 79 | 108.82 | 110.07 | 101.1  |
| 80 | 17.87  | 18.04  | 101.0  |
| 81 | 3.49   | 3.42   | 97.99  |
| 82 | 1.65   | 1.57   | 95.15  |
| 83 | 22.78  | 22.67  | 99.52  |
| 84 | 77.39  | 78.45  | 101.37 |
| 85 | 4.84   | 4.58   | 94.63  |
| 86 | 1.62   | 1.55   | 95.68  |
| 87 | 18.19  | 19.12  | 105.11 |
| 88 | 38.77  | 37.09  | 95.67  |
| 89 | 6.5    | 6.37   | 98.00  |
| 90 | 4.9    | 4.96   | 101.2  |
| 91 | 71.34  | 69.16  | 96.94  |
| 92 | 110.4  | 107.4  | 97.28  |

---

---

|     |        |        |       |
|-----|--------|--------|-------|
| 93  | 2.31   | 2.09   | 90.48 |
| 94  | 2.99   | 2.88   | 96.32 |
| 95  | 251.57 | 249.13 | 99.03 |
| 96  | 2.71   | 2.84   | 104.8 |
| 97  | 110.56 | 109.81 | 99.32 |
| 98  | 90.47  | 92.72  | 102.5 |
| 99  | 31.07  | 30.27  | 97.43 |
| 100 | 7.22   | 7.25   | 100.4 |
| 101 | 65.51  | 64.7   | 98.76 |
| 102 | 4.78   | 4.77   | 99.79 |
| 103 | 99.09  | 101.24 | 102.2 |
| 104 | 3.82   | 3.99   | 104.5 |
| 105 | 189.94 | 185.95 | 97.90 |
| 106 | 33.19  | 34.53  | 104.0 |
| 107 | 4.86   | 4.94   | 101.6 |
| 108 | 67.8   | 71.26  | 105.1 |
| 109 | 104.12 | 104.7  | 100.6 |
| 110 | 2.19   | 2.12   | 96.80 |
| 111 | 3.05   | 2.87   | 94.10 |
| 112 | 245.38 | 253.29 | 103.2 |
| 113 | 2.83   | 2.71   | 95.76 |
| 114 | 44.47  | 45.69  | 102.7 |
| 115 | 95.91  | 100.2  | 104.5 |
| 116 | 21.99  | 20.85  | 94.82 |
| 117 | 34.9   | 33.13  | 94.93 |
| 118 | 111.44 | 110.76 | 99.39 |
| 119 | 17.99  | 18.1   | 100.6 |
| 120 | 3.52   | 3.44   | 97.73 |

---



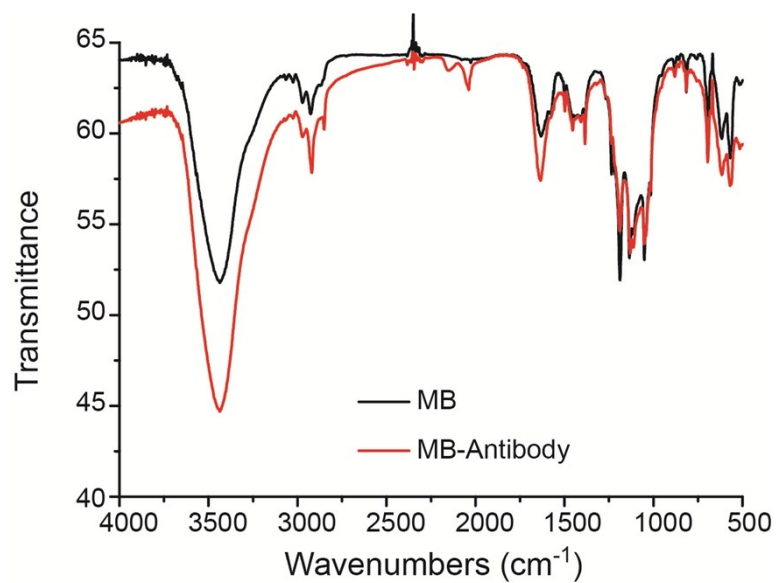

**Figure S1.** Infrared spectroscopy of MB and antibody labelled MB.

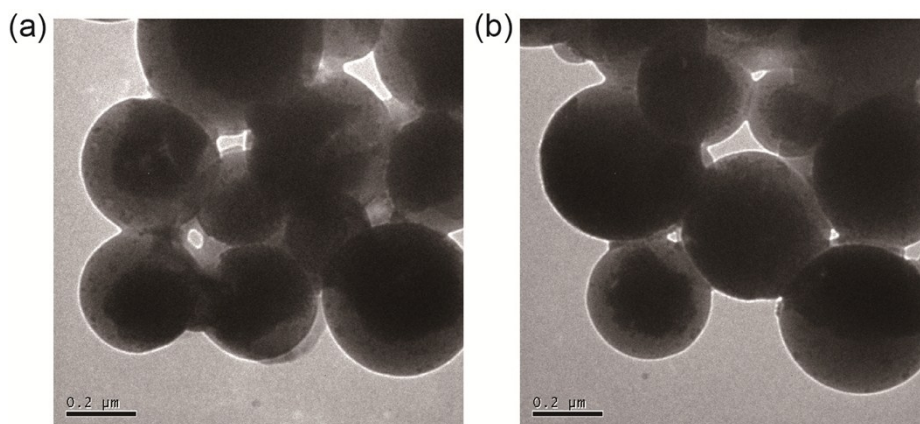

**Figure S2.** TEM image of MB (a) and antibody labelled MB (b).
